# Supplementary material for: Rutaecarpine Promotes Adipose Thermogenesis and Protects against HFD-Induced Obesity via AMPK/PGC-1α Pathway
Source: MDPI journal article supplement (doi:10.3390/ph15040469), 2022-04-13
Supplement: s1 [file s1]

**Supplementary Table S1. Primer sequences used in real time Q-PCR (mouse).**

| Genes                                   | Sequence                    |
|-----------------------------------------|-----------------------------|
| <i>36b4</i> forward                     | TTTGGGCATCACCACGAAAA        |
| <i>36b4</i> reverse                     | GGACACCCTCCAGAAAGCGA        |
| <i>Prkaa1</i> forward                   | AAAGTGAAGGTGGGCAAGCA        |
| <i>Prkaa1</i> reverse                   | CAGATGGTGTACTGATGACCTGG     |
| <i>Prkaa2</i> forward                   | TCGCAGTTTAGATGTTGTTGGA      |
| <i>Prkaa2</i> reverse                   | CTTCAACCCGCCCATGTTTG        |
| <i>Ucp1</i> forward                     | ACTGCCACACCTCCAGTCATT       |
| <i>Ucp1</i> reverse                     | CTTTGCCTCACTCAGGATTGG       |
| <i>Pgc-1<math>\alpha</math></i> forward | ACTGAGCTACCCCTGGGATG        |
| <i>Pgc-1<math>\alpha</math></i> reverse | TAAGAATTTCGGTGGTGACA        |
| <i>Prdm16</i> forward                   | CAGCACGGTGAAGCCATTC         |
| <i>Prdm16</i> reverse                   | GCGTGCATCCGCTTGTG           |
| <i>Cox7a1</i> forward                   | CAGCGTCATGGTCAGTCTGT        |
| <i>Cox7a1</i> reverse                   | AGAAAACCGTGTGGCAGAGA        |
| <i>Pnpla2</i> forward                   | GGTGACCATCTGCCTTCCAG        |
| <i>Pnpla2</i> reverse                   | TGCAGAAGAGACCCAGCAGT        |
| <i>Mcad</i> forward                     | AGCTGCTAGTGGAGCACCAAG       |
| <i>Mcad</i> reverse                     | TCGCCATTTCTGCGAGC           |
| <i>Elovl3</i> forward                   | TTCTCACGCGGGTTAAAAATGG      |
| <i>Elovl3</i> reverse                   | GAGCAACAGATAGACGACCAC       |
| <i>Cox8b</i> forward                    | GAACCATGAAGCCAACGACT        |
| <i>Cox8b</i> reverse                    | GCGAAGTTCACAGTGGTTCC        |
| <i>Dio2</i> forward                     | AATTATGCCTCGGAGAAGACCG      |
| <i>Dio2</i> reverse                     | GGCAGTTGCCTAGTGAAAGGT       |
| <i>Cidea</i> forward                    | TGCTCTTCTGTATCGCCCAGT       |
| <i>Cidea</i> reverse                    | GCCGTGTTAAGGAATCTGCTG       |
| <i>Ppara</i> forward                    | AGGCCGTTGCCACTGTTTCA        |
| <i>Ppara</i> reverse                    | AGCCCTCTTCATCCCCAAGC        |
| <i>18S rRNA</i> forward                 | AGT CCC TGC CCT TTG TAC ACA |
| <i>18S rRNA</i> reverse                 | CGATCCGAGGGCCTCACTA         |
| <i>16S rRNA</i> forward                 | CCGCAAGGGAAAGATGAAAGAC      |
| <i>16S rRNA</i> reverse                 | TCGTTTGTTTCGGGGTTTC         |
| <i>ATP6</i> forward                     | CTATTCCCATCCTCAAAACG        |
| <i>ATP6</i> reverse                     | CTTTTGGTGTGTGGATTAGC        |
| <i>COX1</i> forward                     | GCTAGCCGCAGGCATTACTA        |
| <i>COX1</i> reverse                     | CTCCTCCAGCGGGATCAAAG        |
| <i>ND3</i> forward                      | GTTGCATTCTGACTCCCCCA        |
| <i>ND3</i> reverse                      | GGTAGACGTGCAGAGCTTGT        |

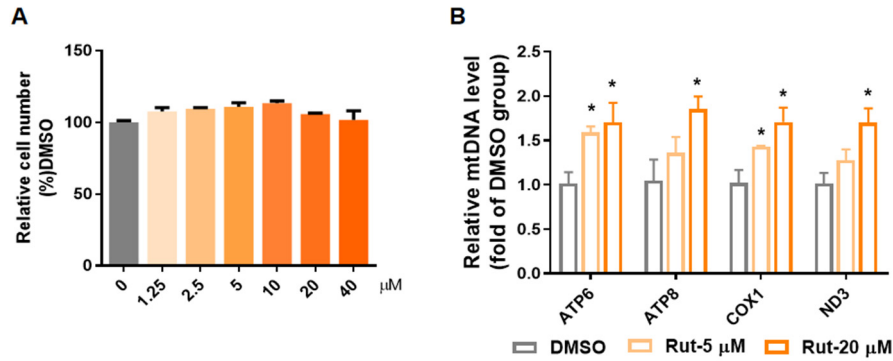

**Figure S1.** Rut has a satisfactory safety and increases mitochondrial copy number of adipocytes. (A) Cell vitality after different concentration Rut treatment. (B) Mitochondrial copy number of C3H10-T1/2 with Rut treatment. The copy number of mtDNA was normalized to nuclear DNA (18S ribosomal RNA).  $n=3$  per group. Data are presented as the means  $\pm$  SEM. \* $P < 0.05$ , Rut groups versus vehicle group by one-way ANOVA.

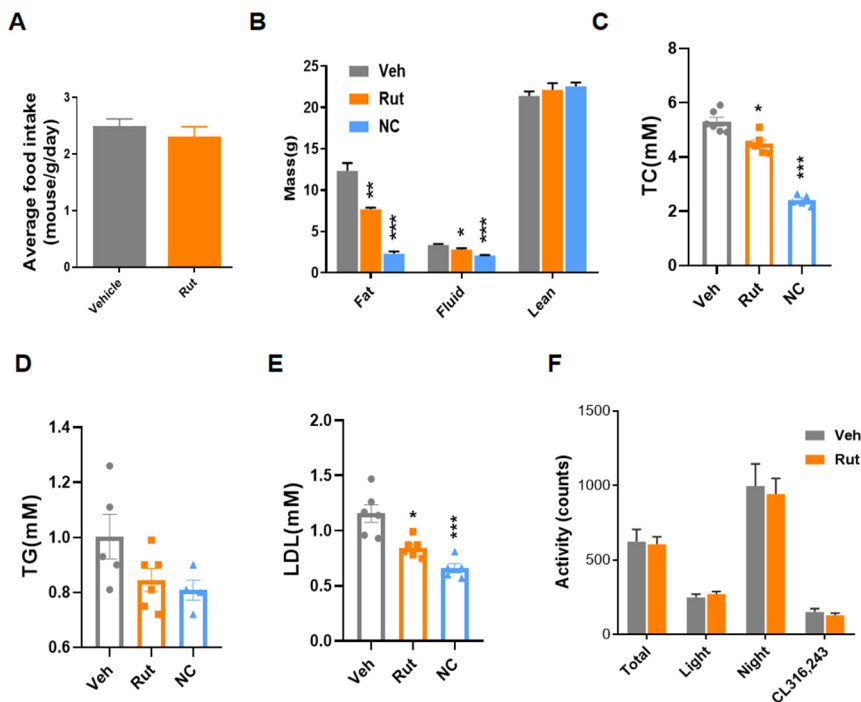

**Figure S2.** Rut improves lipid accumulation and enhances energy expenditure without altered food intake and locomotor activity. (A) Average food intake of HFD mice. (B) Body composition of HFD mice. (C-E) plasma concentrations of total cholesterol (TC), triglyceride (TG) and low-density lipoprotein (LDL). (F) Monitoring of mice activity in basal and cold stimuli condition.  $n=3-6$  per group. Data are presented as the means  $\pm$  SEM. Student's t-test. \* $P < 0.05$ , \*\* $P < 0.01$ , \*\*\* $P < 0.001$  compared with the indicated control group.

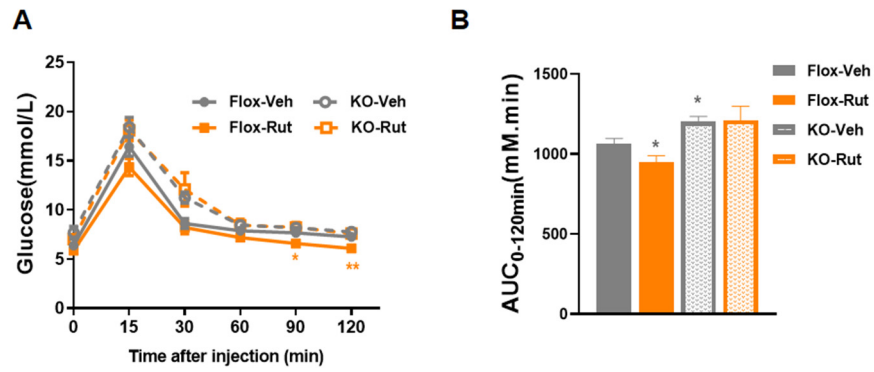

**Figure S3.** AMPK deficiency fails to achieve Rut-induced glucose tolerance improvement. (A) Blood glucose during OGTT. (B) Area under OGTT curve. n=5-6 per group. Data are presented as the means  $\pm$  SEM. Student's t-test. \*P < 0.05, \*\*P < 0.01 compared with the indicated control group.
